P3127

# Optimal revascularization strategy in non-ST-segment elevation myocardial infarction with multivessel coronary artery disease: staged vs. one-time vs. culprit-only revascularization

M. Kim<sup>1</sup>, Y. Ahn<sup>1</sup>, M.H. Jeong<sup>1</sup>, D.S. Sim<sup>1</sup>, Y.J. Hong<sup>1</sup>, J.H. Kim<sup>1</sup>, T.H. Ahn<sup>2</sup>, K.B. Seung<sup>3</sup>, H.S. Kim<sup>4</sup>, H.C. Gwon<sup>5</sup>, S.C. Chae<sup>6</sup>, S.H. Hur<sup>7</sup>, K.S. Cha<sup>8</sup>

<sup>1</sup>Chonnam National University Hospital, Gwangju, Korea (Republic of); <sup>2</sup>Gil Hospital, Incheon, Korea (Republic of); <sup>3</sup>Seoul St. Mary's Hospital, Seoul, Korea (Republic of); <sup>4</sup>Seoul National University Hospital, Seoul, Korea (Republic of); <sup>5</sup>Samsung Medical Center, Seoul, Korea (Republic of); <sup>6</sup>Kyungpook National University Hospital, Daegu, Korea (Republic of); <sup>7</sup>Keimyung University Hospital Dongsan Medical Center, Daegu, Korea (Republic of); <sup>8</sup>Pusan National University Hospital, Pusan, Korea (Republic of)

**Background/Introduction:** Although optimal revascularization strategy in patients with ST-segment elevation myocardial infarction with multivessel coronary artery disease (MVD) was well established, there are few studies which investigated optimal revascularization strategy in non-ST-segment elevation myocardial infarction (NSTEMI) with MVD.

**Purpose:** We investigated 2-year clinical outcomes according to strategy of revascularization in patients with NSTEMI and MVD.

**Methods:** Between November 2011 and October 2015, a total of 2474 patients with NSTEMI and MVD who underwent successful percutaneous coronary intervention were analyzed from the Korea Acute Myocardial Infarction Registry-National Institute of Health (staged 308, one-time 1043 and culprit-only 1123 patients). We did not include patients with left main disease and cardiogenic shock. Primary endpoint was major adverse cardiac events (MACE: the composite of cardiac death, myocardial infarction [MI] or target-vessel revascularization [TVR]) during 2-year follow-up (median 737 days [interquartile range 705–764]). We also analyzed the of all-cause mortality, stroke and non-TVR.

**Results:** Baseline characteristics such as age, gender, and prevalence of atherosclerotic risk factors between multivessel revascularization (MVR; staged or one-time revascularization) and CVR were similar. There was also no difference in symptom to balloon time in 2 groups. MACE occurred

in 305 patients (12.3%) during 2-year follow-up. MVR could reduce incidence of MACE (10.2% vs. 14.9%; adjusted hazard ratio [HR] 1.50 for CVR, 95% confidence interval [CI] 1.20–1.88,  $p < 0.001$ ), all-cause death (8.4% vs. 12.1%; adjusted HR 1.45 for CVR, 95% CI 1.13–1.87,  $p = 0.003$ ) and non-TVR (1.9% vs. 7.0%; adjusted HR 3.99 for CVR, 95% CI 2.55–6.27,  $p < 0.001$ ). There was no difference in incidence of stroke between MVR and CVR. We also analyzed same analysis between staged and one-time revascularization. Complete revascularization was more achieved in one-time revascularization group compared to staged revascularization group (62.0% vs. 76.1%,  $p < 0.001$ ). In multivariate Cox-regression analysis, staged revascularization was not associated with improved clinical outcomes in terms of MACE (HR 0.74, 95% CI 0.50–1.09,  $p = 0.126$ ), all-cause death (HR 1.07, 95% CI 0.69–1.68,  $p = 0.759$ ), stroke (HR 1.75, 95% CI 0.68–4.52,  $p = 0.245$ ) and non-TVR (HR 2.56, 95% CI 0.75–8.68,  $p = 0.132$ ). Analysis by propensity score matching and inverse probability of treatment weighting did not significantly affect the results.

**Conclusions:** MVR reduced 2-year adverse cardiac events in patients with NSTEMI and MVD compared to CVR. However, staged revascularization was not superior to one-time revascularization for reducing MACE among NSTEMI patients with MVD who received MVR.
